# Supplementary material for: Prediction of immunotherapy response using mutations to cancer protein assemblies
Source: PubMed Central journal article supplement — Sci Adv. 2024 Sep 20;10(38):eado9746. doi: 10.1126/sciadv.ado9746 (PMC11414719; doi:10.1126/sciadv.ado9746), 2024-09-20
Supplement: sciadv.ado9746_sm.pdf [file sciadv.ado9746_sm.pdf]

Supplementary Materials for

**Prediction of immunotherapy response using mutations to cancer  
protein assemblies**

JungHo Kong *et al.*

Corresponding author: Hannah Carter, [hkcarter@health.ucsd.edu](mailto:hkcarter@health.ucsd.edu); Trey Ideker, [tideker@health.ucsd.edu](mailto:tideker@health.ucsd.edu)

*Sci. Adv.* **10**, eado9746 (2024)  
DOI: 10.1126/sciadv.ado9746

**The PDF file includes:**

Supplementary Text  
Figs. S1 to S7  
Legends for data S1 to S10  
References

**Other Supplementary Material for this manuscript includes the following:**

Data S1 to S10

## **Supplementary Text**

### **Model performance in Samstein cohort**

It has been previously suggested that comparing patients with similar predicted risks to compute CI measures does not lead to clinically meaningful predictions (77). To reduce the number of comparisons between patients with similar predicted risks, we considered a threshold of 30%, where patients with top and bottom 30% of the predicted risk scores were selected (totaling 60% of the test dataset) (Fig. S6). To test the robustness of our approach, we recomputed the predictive performance across different thresholds (Fig. S6). To complement the analysis of protein assemblies in NeST, we also evaluated AMBs for gene sets documented in Reactome (78) and GO-Slim (79). We found that neither pathway database improved prediction performance compared to using NeST in the discovery cohort (Fig. S7).

### ***In-vivo* CRISPR screening in mice**

To functionally validate the importance of the assemblies in modulating immunotherapy response, we used a public CRISPR screening data in a lung cancer model (37). Lewis lung carcinoma cell line was used for the CRISPR screens. A recent study suggested that Lewis lung carcinoma is similar to human lung adenocarcinoma (80), which allows investigation of this screening data suitable for our study. STARS algorithm (81) was used to compute the gene-level statistical significance of CRISPR screening results. We tested for significant differences (significance score) in single-guide RNA abundance between untreated and anti-PD-1 + anti-CTLA4-treated immunocompetent mice. The resulting significance scores were used to calculate the enrichment of an assembly by running a Gene Set Enrichment Analysis (GSEA) (82). We used the GSEAPy (83) python package to compute assembly-level significance (FDR corrected p-value), identifying 77 enriched assemblies at a False Discovery Rate (FDR) of 0.25 (Fig. 4C).

### **Relating AMB predictions to immune phenotypes**

We used the AMB model to calculate the predicted ICI responses of each patient in the TCGA lung adenocarcinoma (TCGA-LUAD) (40) and lung squamous cell carcinoma (TCGA-LUSC) (41) cohorts, as these cohorts include matched somatic mutation, mRNA expression, and histology imaging data. We designated the 20% of TCGA patients with the lowest predicted risk scores as “predicted responders” (low-risk patients) and the others as “predicted non-responders” (high-risk patients). To compute the association between these AMB predictions and immune infiltration phenotypes, we considered 8 individual features that were generated from gene expression or histology. The gene expression features included inferred proportions of (i) CD8+ T cells, (ii) M1 macrophages, (iii) CD4+ T cells and (iv) regulatory T cells, all obtained from a previous study (84). We additionally computed the expression of signals related to tumor-associated macrophages, by leveraging a set of genes (6, 85) for which high mRNA expression is indicative of the feature. We conducted a single-sample gene set enrichment analysis (ssGSEA) using the GSEAPy Python package (83) to score each gene set in each tumor sample.

### **Quantification of tumor-infiltrating lymphocytes using histology**

To analyze hematoxylin and eosin (H&E)-stained histology image-based features (Fig. 5), we used the Lunit SCOPE IO software to classify the tumor microenvironment based on the spatial distribution and density of tumor-infiltrating lymphocytes (TILs) (39). Lunit SCOPE IO is composed of two deep learning models: a cell detection model and a tissue segmentation model. The cell detection model detects the location of lymphocytes and tumor cells, which employs a DeepLabV3+ (86) architecture with a Resnet-34 (87) backbone. The tissue segmentation model determines if a pixel belongs to cancer epithelium, cancer stroma, or background regions, using the same architecture as the cell detection model. The cell detection model was developed with

patches extracted from 3,334 whole-slide images (WSIs;  $N=2,485$  for training and  $N=849$  for tuning) and the tissue segmentation model was developed with patches extracted from 15,830 WSIs ( $N=15,004$  for training, and  $N=826$  for tuning). To perform spatial analysis of heterogeneous TIL distributions within WSI of various sizes, each WSI was divided into  $0.25 \text{ mm}^2$  grids, with the immune phenotype of each grid classified based on the following criteria (88, 89): “Inflamed,” if the TIL density within the total cancer epithelial area (CA) in the grid is  $\geq 130/\text{mm}^2$ ; “Immune-Excluded,” if the TIL density within the total CA is  $< 130/\text{mm}^2$  and that within the total cancer stroma (CS) is  $\geq 260/\text{mm}^2$ ; or “Immune-Desert,” if the TIL densities are below threshold in both the total CA and CS within the grid. The final WSI-level Inflamed score, Immune-Excluded score, and Immune-Desert score were calculated by dividing the number of grids having that respective phenotype over the total number of grids analyzed.

### **Calculating associations between assembly-level AMB and TIL features**

To test the association between immune infiltration phenotypes and AMB status of an assembly (Supplementary Fig. 3F-H), we conducted a non-linear regression (Random Forest Regression from Scikit-learn Python package (90)) that aims to predict immune phenotypes using AMB levels of 13 important assemblies. To determine the importances of assemblies in predicting immune phenotypes (Supplementary Fig. 3F-H), we computed SHapley Additive exPlanations (SHAP) values (91). Default settings of “Explainer” function from the SHAP Python package were used to measure feature importances (91). To visualize associations across assembly mutational status and immune phenotypes, we used the plotly Python package (92) to draw a Sankey diagram (Fig. 5E).

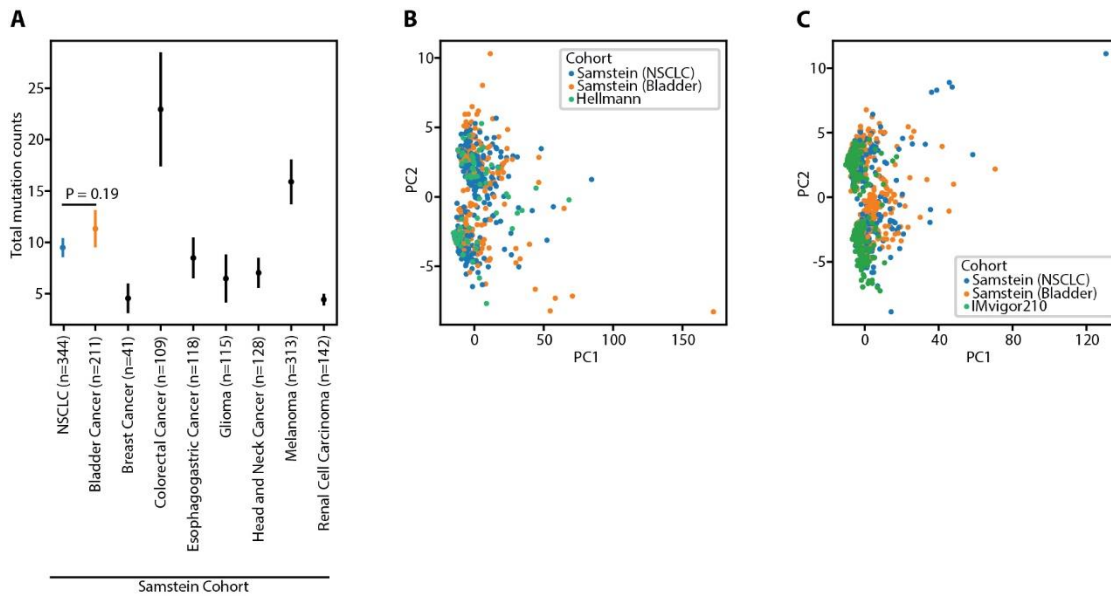

**Fig. S1. Supplemental characterization of immunotherapy cohorts.** **A** Distribution of total mutation counts for patients in the Samstein cohort. Error bars represent 95% confidence intervals. Mann-Whitney U test used to compute p-value. **B-C** Principal component (PC) analysis using the profile of AMBs across all assemblies, with PC1 and PC2 of each patient plotted for Samstein cohort and **B** Hellmann cohort or **C** IMvigor210 cohort. NSCLC: Non-Small Cell Lung Cancer.

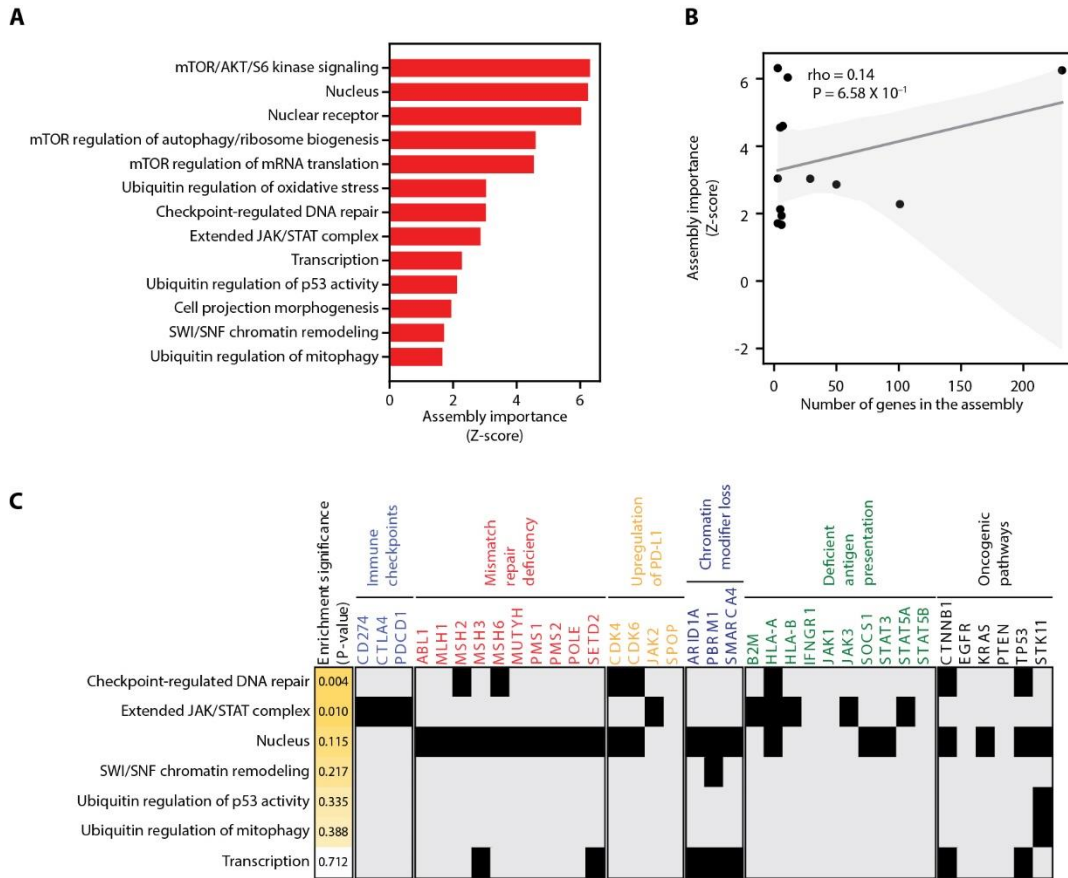

**Fig. S2. Supplemental analysis of important assemblies.** **A** Z-score-converted assembly importance scores from the model. Important assemblies shown ( $z \geq 1.64$ ). **B** Importance versus size of important protein assemblies. Spearman correlation and significance of correlation is shown. Grey area represents 95% confidence of the fitted linear line. **C** Correspondence between important protein assemblies (rows) and previously reported single-gene biomarkers of ICI response (columns). Black squares indicate mapping of genes to assemblies. Enrichment of an assembly for the previously reported biomarkers is also shown (hypergeometric p-value, leftmost column).

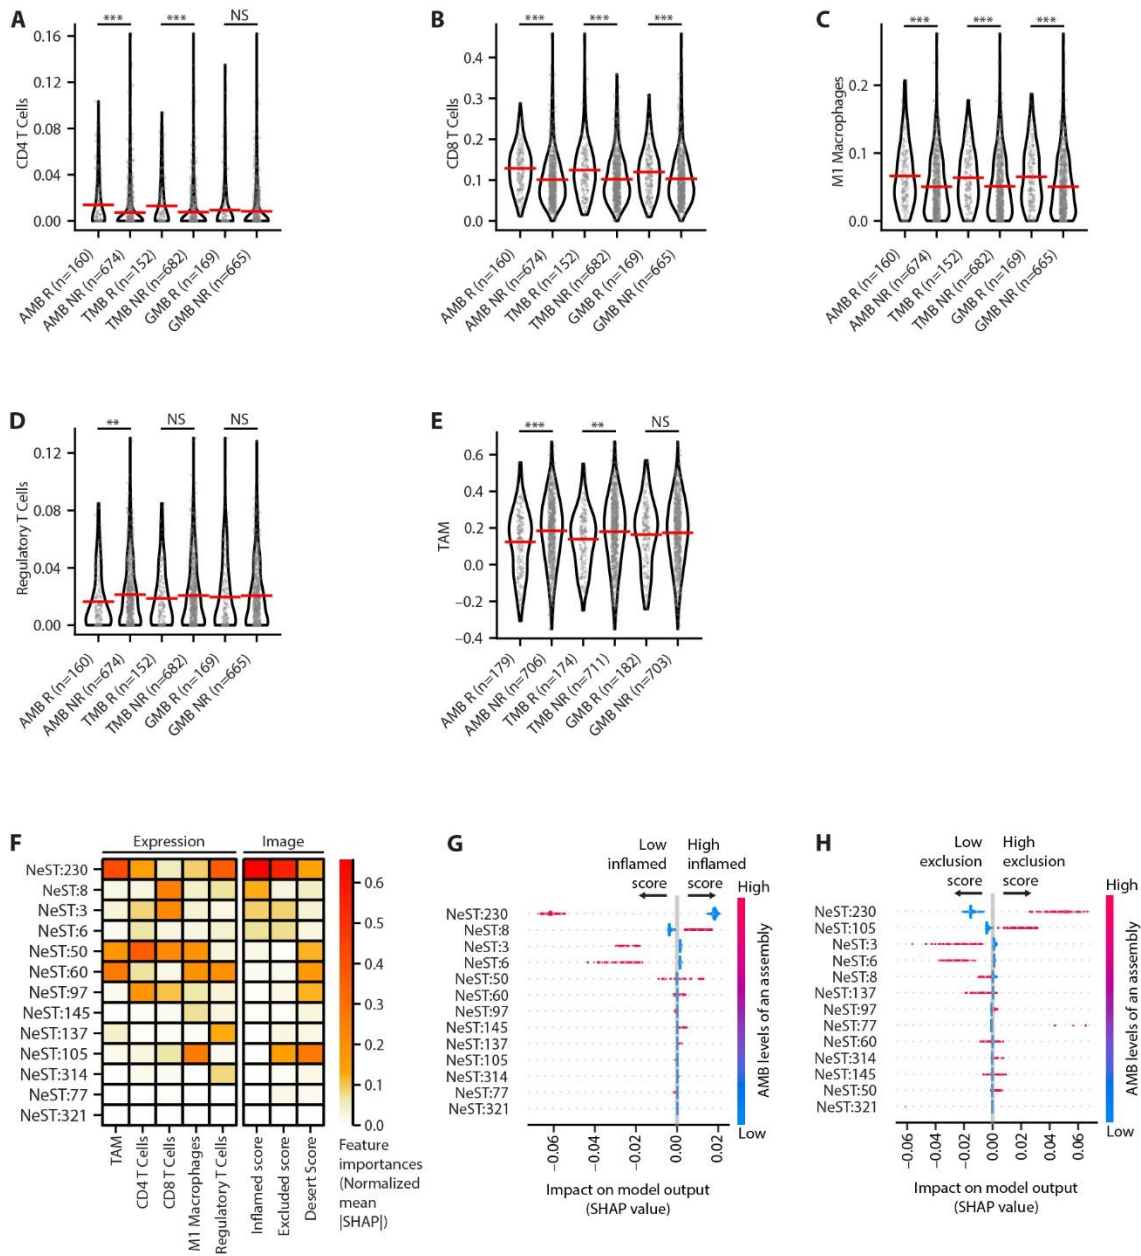

**Fig. S3. Relation of AMB model to independent immunogenic features.** A-E AMB predictions are correlated with various immunogenic features, which includes expression profiles related to **A** CD4 T cells, **B** CD8 T cells, **C** M1 macrophages, **D** Regulatory T cells and **E** Tumor associated macrophages (TAM). Mann-Whitney U test was used to compute statistical significance. \*  $P < 0.05$ ; \*\*  $P < 0.01$ ; \*\*\*  $P < 0.001$ ; NS  $P > 0.05$ . Red horizontal bars indicate the mean. **F** Feature importances of 13 important assemblies in predicting immune phenotypes. Feature importances were computed using SHAP values (average of absolute SHAP values)(91). Feature importance scores were normalized by dividing each importance score with the total sum of importance scores. **G, H** Raw SHAP values for predicting **G** inflamed or **H** exclusion scores. Each dot represents the AMB level of an assembly in a patient.

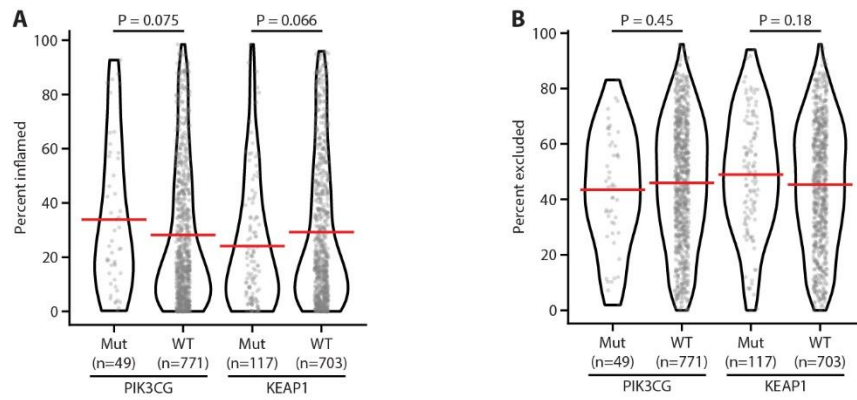

**Fig. S4. Relation of individual gene mutations to immunogenic features. A, B** Association between mutated (Mut) or wild-type (WT) genes and immune phenotypes from H&E stained image in the TCGA dataset. Mann-Whitney U test was used to compute statistical significance.



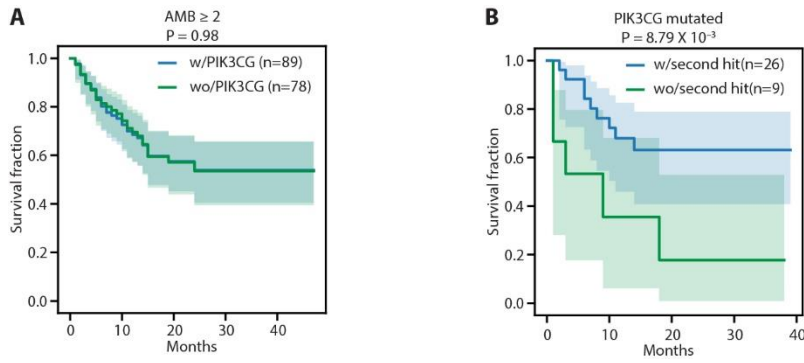

**Fig. S5. Impact of PIK3CG on NeST:8 AMB's performance.** **A** Predictive performance in the Samstein cohort when using patients with NeST:8 AMB $\geq 2$ , stratified by PIK3CG mutated (w/PIK3CG) or not mutated (wo/PIK3CG). Log-rank test was used to compute statistical significance. **B** Predictive performance among patients with PIK3CG mutations, stratified by either having an additional mutation in NeST:8 components (w/second hit) or without additional mutation (wo/second hit).

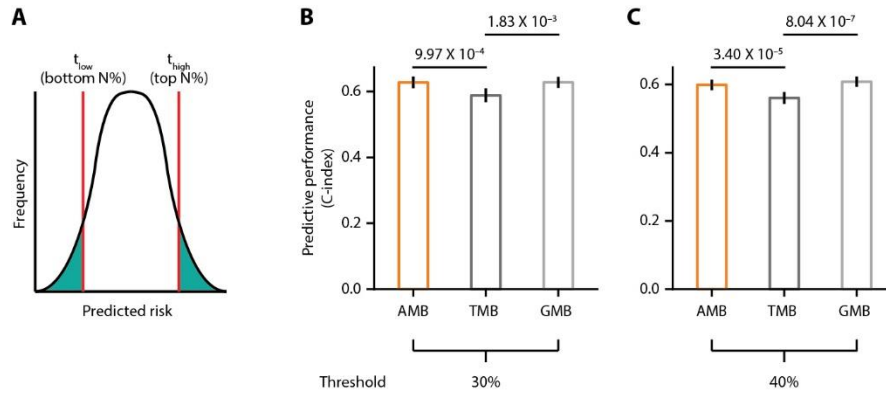

**Fig. S6. Prediction of overall survival in Samstein cohort across varying thresholds.** **A** Top N% and bottom N% of the patients were used to compute concordance index (C-index). **B-D** Assessment of predictive performance across varying thresholds for N, spanning **B** 30%, **C** 40%. To measure predictive performance, random 90/10 splits were used (90% train/10% test, 100 independent iterations). The Mann-Whitney U test was used to compute statistical significance.

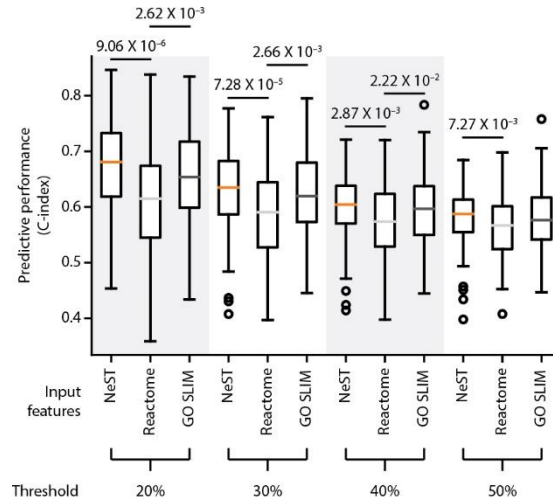

**Fig. S7. Prediction across sources of cancer pathway knowledge. A** Predictive performance in the Samstein cohort when using AMBs computed in three ways, using assemblies in NeST, pathways in Reactome, or terms in the Gene Ontology (GO) SLIM database. To measure predictive performance, a random 90/10 split of samples was used (100 independent iterations) to allot training versus testing datasets, respectively. Predictive performance was measured using concordance index (C-index). Box plot shows median value and interquartile range (IQR) as bounds of the box. Whiskers of the box plot extends from the box to upper/lower quartile  $\pm$  IQR  $\times$  1.5. Mann-Whitney U test was used to compute statistical significance.

**Data S1. (separate file)**

*Best hyper-parameters identified during Monte Carlo cross validation in the Samstein cohort*

**Data S2. (separate file)**

*Predicted risk scores in Hellmann cohort*

**Data S3. (separate file)**

*Predicted risk scores in IMvigor210 cohort*

**Data S4. (separate file)**

*Number of overlapping assemblies between (i) important assemblies from AMB model and (ii) CRISPR enriched assemblies*

**Data S5. (separate file)**

*Gene Set Enrichment Analysis (GSEA) results from CRISPR analysis*

**Data S6. (separate file)**

*Predicted responders and non-responders using AMB or GMB scores in TCGA*

**Data S7. (separate file)**

*Predicted responders and non-responders using TMB levels in TCGA*

**Data S8. (separate file)**

*TIL scores measured using immunohistology images in TCGA*

**Data S9. (separate file)**

*Enrichment of gene expression levels of tumor-associated macrophage markers using single sample GSEA (ssGSEA) in TCGA*

**Data S10. (separate file)**

*Feature importances of NeST assemblies from AMB model*

## REFERENCES AND NOTES

1. A. D. Waldman, J. M. Fritz, M. J. Lenardo, A guide to cancer immunotherapy: From T cell basic science to clinical practice. *Nat. Rev. Immunol.* **20**, 651–668 (2020).
2. Y. Jing, J. Liu, Y. Ye, L. Pan, H. Deng, Y. Wang, Y. Yang, L. Diao, S. H. Lin, G. B. Mills, G. Zhuang, X. Xue, L. Han, Multi-omics prediction of immune-related adverse events during checkpoint immunotherapy. *Nat. Commun.* **11**, 4946 (2020).
3. D. Y. Wang, J.-E. Salem, J. V. Cohen, S. Chandra, C. Menzer, F. Ye, S. Zhao, S. Das, K. E. Beckermann, L. Ha, W. K. Rathmell, K. K. Ancell, J. M. Balko, C. Bowman, E. J. Davis, D. D. Chism, L. Horn, G. V. Long, M. S. Carlino, B. Lebrun-Vignes, Z. Eroglu, J. C. Hassel, A. M. Menzies, J. A. Sosman, R. J. Sullivan, J. J. Moslehi, D. B. Johnson, Fatal toxic effects associated with immune checkpoint inhibitors. *JAMA Oncol.* **4**, 1721–1728 (2018).
4. C. H. June, J. T. Warshauer, J. A. Bluestone, Is autoimmunity the Achilles' heel of cancer immunotherapy? *Nat. Med.* **23**, 540–547 (2017).
5. N. Auslander, G. Zhang, J. S. Lee, D. T. Frederick, B. Miao, T. Moll, T. Tian, Z. Wei, S. Madan, R. J. Sullivan, G. Boland, K. Flaherty, M. Herlyn, E. Ruppin, Robust prediction of response to immune checkpoint blockade therapy in metastatic melanoma. *Nat. Med.* **24**, 1545–1549 (2018).
6. P. Jiang, S. Gu, D. Pan, J. Fu, A. Sahu, X. Hu, Z. Li, N. Traugh, X. Bu, B. Li, J. Liu, G. J. Freeman, M. A. Brown, K. W. Wucherpfennig, X. S. Liu, Signatures of T cell dysfunction and exclusion predict cancer immunotherapy response. *Nat. Med.* **24**, 1550–1558 (2018).
7. A. Bagaev, N. Kotlov, K. Nomie, V. Svekolkina, A. Gafurov, O. Isaeva, N. Osokin, I. Kozlov, F. Frenkel, O. Gancharova, N. Almog, M. Tsiper, R. Ataulakhanov, N. Fowler, Conserved pan-cancer microenvironment subtypes predict response to immunotherapy. *Cancer Cell* **39**, 845–865.e7 (2021).
8. J. S. Lee, N. U. Nair, G. Dinstag, L. Chapman, Y. Chung, K. Wang, S. Sinha, H. Cha, D. Kim, A. V. Schperberg, A. Srinivasan, V. Lazar, E. Rubin, S. Hwang, R. Berger, T. Beker, Z. Ronai, S. Hannenhalli, M. R. Gilbert, R. Kurzrock, S. H. Lee, K. Aldape, E. Ruppin, Synthetic lethality-mediated precision oncology via the tumor transcriptome. *Cell* **184**, 2487–2502.e13 (2021).

9. Ó. Lapuente-Santana, M. van Genderen, P. A. J. Hilbers, F. Finotello, F. Eduati, Interpretable systems biomarkers predict response to immune-checkpoint inhibitors. *Patterns* **2**, 100293 (2021).
10. J. H. Kong, D. Ha, J. Lee, I. Kim, M. Park, S. H. Im, K. Shin, S. Kim, Network-based machine learning approach to predict immunotherapy response in cancer patients. *Nat. Commun.* **13**, 3703 (2022).
11. S. Mariathasan, S. J. Turley, D. Nickles, A. Castiglioni, K. Yuen, Y. Wang, E. E. Kadel, H. Koepfen, J. L. Astarita, R. Cubas, S. Jhunjhunwala, R. Banchereau, Y. Yang, Y. Guan, C. Chalouni, J. Ziai, Y. Şenbabaoğlu, S. Santoro, D. Sheinson, J. Hung, J. M. Giltane, A. A. Pierce, K. Mesh, S. Lianoglou, J. Riegler, R. A. D. Carano, P. Eriksson, M. Höglund, L. Somarriba, D. L. Halligan, M. S. Van Der Heijden, Y. Loriot, J. E. Rosenberg, L. Fong, I. Mellman, D. S. Chen, M. Green, C. Derleth, G. D. Fine, P. S. Hegde, R. Bourgon, T. Powles, TGF $\beta$  attenuates tumour response to PD-L1 blockade by contributing to exclusion of T cells. *Nature* **554**, 544–548 (2018).
12. Y. Zhou, I. N. Bastian, M. D. Long, M. Dow, W. Li, T. Liu, R. K. Ngu, L. Antonucci, J. Y. Huang, Q. T. Phung, X. H. Zhao, S. Banerjee, X. J. Lin, H. Wang, B. Dang, S. Choi, D. Karin, H. Su, M. H. Ellisman, C. Jamieson, M. Bosenberg, Z. Cheng, J. Haybaeck, L. Kenner, K. M. Fisch, R. Bourgon, G. Hernandez, J. R. Lill, S. Liu, H. Carter, I. Mellman, M. Karin, S. Shalpour, Activation of NF- $\kappa$ B and p300/CBP potentiates cancer chemoimmunotherapy through induction of MHC-I antigen presentation. *Proc. Natl. Acad. Sci. U. S. A.* **118**, e2025840118 (2021).
13. N. A. Rizvi, M. D. Hellmann, A. Snyder, P. Kvistborg, V. Makarov, J. J. Havel, W. Lee, J. Yuan, P. Wong, T. S. Ho, M. L. Miller, N. Rekhtman, A. L. Moreira, F. Ibrahim, C. Bruggeman, B. Gasmi, R. Zappasodi, Y. Maeda, C. Sander, E. B. Garon, T. Merghoub, J. D. Wolchok, T. N. Schumacher, T. A. Chan, Cancer immunology. Mutational landscape determines sensitivity to PD-1 blockade in non-small cell lung cancer. *Science* **348**, 124–128 (2015).
14. M. Yarchoan, A. Hopkins, E. M. Jaffee, Tumor mutational burden and response rate to PD-1 inhibition. *N. Engl. J. Med.* **377**, 2500–2501 (2017).
15. L. Marcus, S. J. Lemery, P. Keegan, R. Pazdur, FDA approval summary: Pembrolizumab for the treatment of microsatellite instability-high solid tumors. *Clin. Cancer Res.* **25**, 3753–3758 (2019).

16. D. J. McGrail, P. G. Pilié, N. U. Rashid, L. Voorwerk, M. Slagter, M. Kok, E. Jonasch, M. Khasraw, A. B. Heimberger, B. Lim, N. T. Ueno, J. K. Litton, R. Ferrarotto, J. T. Chang, S. L. Moulder, S. Y. Lin, High tumor mutation burden fails to predict immune checkpoint blockade response across all cancer types. *Ann. Oncol.* **32**, 661-672 (2021).
17. M. Gromeier, M. C. Brown, G. Zhang, X. Lin, Y. Chen, Z. Wei, N. Beaubier, H. Yan, Y. He, A. Desjardins, J. E. Herndon, F. S. Varn, R. G. Verhaak, J. Zhao, D. P. Bolognesi, A. H. Friedman, H. S. Friedman, F. McSherry, A. M. Muscat, E. S. Lipp, S. K. Nair, M. Khasraw, K. B. Peters, D. Randazzo, J. H. Sampson, R. E. McLendon, D. D. Bigner, D. M. Ashley, Very low mutation burden is a feature of inflamed recurrent glioblastomas responsive to cancer immunotherapy. *Nat. Commun.* **12**, 352 (2021).
18. J. H. Shim, H. S. Kim, H. Cha, S. Kim, T. M. Kim, V. Anagnostou, Y. L. Choi, H. A. Jung, J. M. Sun, J. S. Ahn, M. J. Ahn, K. Park, W. Y. Park, S. H. Lee, HLA-corrected tumor mutation burden and homologous recombination deficiency for the prediction of response to PD-(L)1 blockade in advanced non-small-cell lung cancer patients. *Ann. Oncol.* **31**, 902–911 (2020).
19. N. McGranahan, A. J. S. Furness, R. Rosenthal, S. Ramskov, R. Lyngaa, S. K. Saini, M. Jamal-Hanjani, G. A. Wilson, N. J. Birkbak, C. T. Hiley, T. B. K. Watkins, S. Shafi, N. Murugaesu, R. Mitter, A. U. Akarca, J. Linares, T. Marafioti, J. Y. Henry, E. M. Van Allen, D. Miao, B. Schilling, D. Schadendorf, L. A. Garraway, V. Makarov, N. A. Rizvi, A. Snyder, M. D. Hellmann, T. Merghoub, J. D. Wolchok, S. A. Shukla, C. J. Wu, K. S. Peggs, T. A. Chan, S. R. Hadrup, S. A. Quezada, C. Swanton, Clonal neoantigens elicit T cell immunoreactivity and sensitivity to immune checkpoint blockade. *Science* **351**, 1463–1469 (2016).
20. N. McGranahan, C. Swanton, Neoantigen quality, not quantity. *Sci. Transl. Med.* **11**, eaax7918 (2019).
21. N. Niknafs, A. Balan, C. Cherry, K. Hummelink, K. Monkhorst, X. M. Shao, Z. Belcaid, K. A. Marrone, J. Murray, K. N. Smith, B. Levy, J. Feliciano, C. L. Hann, V. Lam, D. M. Pardoll, R. Karchin, T. Y. Seiwert, J. R. Brahmer, P. M. Forde, V. E. Velculescu, V. Anagnostou, Persistent mutation burden drives sustained anti-tumor immune responses. *Nat. Med.* **29**, 440–449 (2023).
22. T. E. Keenan, K. P. Burke, E. M. Van Allen, Genomic correlates of response to immune checkpoint blockade. *Nat. Med.* **25**, 389–402 (2019).

23. J. J. Havel, D. Chowell, T. A. Chan, The evolving landscape of biomarkers for checkpoint inhibitor immunotherapy. *Nat. Rev. Cancer* **19**, 133–150 (2019).
24. S. Spranger, R. Bao, T. F. Gajewski, Melanoma-intrinsic  $\beta$ -catenin signalling prevents anti-tumour immunity. *Nature* **523**, 231–235 (2015).
25. M. C. V. Cormedi, E. M. Van Allen, L. M. Colli, Predicting immunotherapy response through genomics. *Curr. Opin. Genet. Dev.* **66**, 1–9 (2021).
26. F. Skoulidis, M. E. Goldberg, D. M. Greenawalt, M. D. Hellmann, M. M. Awad, J. F. Gainor, A. B. Schrock, R. J. Hartmaier, S. E. Trabucco, L. Gay, S. M. Ali, J. A. Elvin, G. Singal, J. S. Ross, D. Fabrizio, P. M. Szabo, H. Chang, A. Sasson, S. Srinivasan, S. Kirov, J. Szustakowski, P. Vitazka, R. Edwards, J. A. Bufill, N. Sharma, S.-H. I. Ou, N. Peled, D. R. Spigel, H. Rizvi, E. J. Aguilar, B. W. Carter, J. Erasmus, D. F. Halpenny, A. J. Plodkowski, N. M. Long, M. Nishino, W. L. Denning, A. Galan-Cobo, H. Hamdi, T. Hirz, P. Tong, J. Wang, J. Rodriguez-Canales, P. A. Villalobos, E. R. Parra, N. Kalhor, L. M. Sholl, J. L. Sauter, A. A. Jungbluth, M. Mino-Kenudson, R. Azimi, Y. Y. Elamin, J. Zhang, G. C. Leonardi, F. Jiang, K.-K. Wong, J. J. Lee, V. A. Papadimitrakopoulou, I. I. Wistuba, V. A. Miller, G. M. Frampton, J. D. Wolchok, A. T. Shaw, P. A. Jänne, P. J. Stephens, C. M. Rudin, W. J. Geese, L. A. Albacker, J. V. Heymach, STK11/LKB1 mutations and PD-1 inhibitor resistance in KRAS-mutant lung adenocarcinoma. *Cancer Discov.* **8**, 822–835 (2018).
27. R. W. Jenkins, R. Thummalapalli, J. Carter, I. Cañadas, D. A. Barbie, Molecular and genomic determinants of response to immune checkpoint inhibition in cancer. *Annu. Rev. Med.* **69**, 333–347 (2018).
28. W. Zhang, Y. Kong, Y. Li, F. Shi, J. Lyu, C. Sheng, S. Wang, Q. Wang, Novel molecular determinants of response or resistance to immune checkpoint inhibitor therapies in melanoma. *Front. Immunol.* **12**, 798474 (2021).
29. M. Montesion, K. Murugesan, D. X. Jin, R. Sharaf, N. Sanchez, A. Guria, M. Minker, G. Li, V. Fisher, E. S. Sokol, D. C. Pavlick, J. A. Moore, A. Braly, G. Singal, D. Fabrizio, L. A. Comment, N. A. Rizvi, B. M. Alexander, G. M. Frampton, P. S. Hegde, L. A. Albacker, Somatic HLA class I loss is a



widespread mechanism of immune evasion which refines the use of tumor mutational burden as a biomarker of checkpoint inhibitor response. *Cancer Discov.* **11**, 282–292 (2021).

30. A. M. Goodman, A. Castro, R. M. Pyke, R. Okamura, S. Kato, P. Riviere, G. Frampton, E. Sokol, X. Zhang, E. D. Ball, H. Carter, R. Kurzrock, MHC-I genotype and tumor mutational burden predict response to immunotherapy. *Genome Med.* **12**, 45 (2020).
31. J. M. Zaretsky, A. Garcia-Diaz, D. S. Shin, H. Escuin-Ordinas, W. Hugo, S. Hu-Lieskovan, D. Y. Torrejon, G. Abril-Rodriguez, S. Sandoval, L. Barthly, J. Saco, B. Homet Moreno, R. Mezzadra, B. Chmielowski, K. Ruchalski, I. P. Shintaku, P. J. Sanchez, C. Puig-Saus, G. Cherry, E. Seja, X. Kong, J. Pang, B. Berent-Maoz, B. Comin-Anduix, T. G. Graeber, P. C. Tumeh, T. N. M. Schumacher, R. S. Lo, A. Ribas, Mutations associated with acquired resistance to PD-1 blockade in melanoma. *N. Engl. J. Med.* **379**, 819–829 (2016).
32. A. Patterson, N. Auslander, Mutated processes predict immune checkpoint inhibitor therapy benefit in metastatic melanoma. *Nat. Commun.* **13**, 5151 (2022).
33. F. Zheng, M. R. Kelly, D. J. Ramms, M. L. Heintschel, K. Tao, B. Tutuncuoglu, J. J. Lee, K. Ono, H. Foussard, M. Chen, K. A. Herrington, E. Silva, S. N. Liu, J. Chen, C. Churas, N. Wilson, A. Kratz, R. T. Pillich, D. N. Patel, J. Park, B. Kuenzi, M. K. Yu, K. Licon, D. Pratt, J. F. Kreisberg, M. Kim, D. L. Swaney, X. Nan, S. I. Fraley, J. S. Gutkind, N. J. Krogan, T. Ideker, Interpretation of cancer mutations using a multiscale map of protein systems. *Science* **374**, eabf3067 (2021).
34. R. M. Samstein, C. H. Lee, A. N. Shoushtari, M. D. Hellmann, R. Shen, Y. Y. Janjigian, D. A. Barron, A. Zehir, E. J. Jordan, A. Omuro, T. J. Kaley, S. M. Kendall, R. J. Motzer, A. A. Hakimi, M. H. Voss, P. Russo, J. Rosenberg, G. Iyer, B. H. Bochner, D. F. Bajorin, H. A. Al-Ahmadie, J. E. Chaft, C. M. Rudin, G. J. Riely, S. Baxi, A. L. Ho, R. J. Wong, D. G. Pfister, J. D. Wolchok, C. A. Barker, P. H. Gutin, C. W. Brennan, V. Tabar, I. K. Mellinshoff, L. M. DeAngelis, C. E. Ariyan, N. Lee, W. D. Tap, M. M. Gounder, S. P. D'Angelo, L. Saltz, Z. K. Stadler, H. I. Scher, J. Baselga, P. Razavi, C. A. Klebanoff, R. Yaeger, N. H. Segal, G. Y. Ku, R. P. DeMatteo, M. Ladanyi, N. A. Rizvi, M. F. Berger, N. Riaz, D. B. Solit, T. A. Chan, L. G. T. Morris, Tumor mutational load predicts survival after immunotherapy across multiple cancer types. *Nat Genet.* **51**. 202–206 (2019).

35. M. D. Hellmann, T. Nathanson, H. Rizvi, B. C. Creelan, F. Sanchez-Vega, A. Ahuja, A. Ni, J. B. Novik, L. M. B. Mangarin, M. Abu-Akeel, C. Liu, J. L. Sauter, N. Rekhtman, E. Chang, M. K. Callahan, J. E. Chaft, M. H. Voss, M. Tenet, X. M. Li, K. Covello, A. Renninger, P. Vitazka, W. J. Geese, H. Borghaei, C. M. Rudin, S. J. Antonia, C. Swanton, J. Hammerbacher, T. Merghoub, N. McGranahan, A. Snyder, J. D. Wolchok, Genomic features of response to combination immunotherapy in patients with advanced non-small-cell lung cancer. *Cancer Cell* **33**, 843–852.e4 (2018).
36. J. Zhang, X. Bu, H. Wang, Y. Zhu, Y. Geng, N. T. Nihira, Y. Tan, Y. Ci, F. Wu, X. Dai, J. Guo, Y. H. Huang, C. Fan, S. Ren, Y. Sun, G. J. Freeman, P. Sicinski, W. Wei, Cyclin D-CDK4 kinase destabilizes PD-L1 via cullin 3-SPOP to control cancer immune surveillance. *Nature* **553**, 91–95.(2018).
37. J. Dubrot, P. P. Du, S. K. Lane-Reticker, E. A. Kessler, A. J. Muscato, A. Mehta, S. S. Freeman, P. M. Allen, K. E. Olander, K. M. Ockerman, C. H. Wolfe, F. Wiesmann, N. H. Knudsen, H.-W. Tsao, A. Iracheta-Vellve, E. M. Schneider, A. N. Rivera-Rosario, I. C. Kohnle, H. W. Pope, A. Ayer, G. Mishra, M. D. Zimmer, S. Y. Kim, A. Mahapatra, H. Ebrahimi-Nik, D. T. Frederick, G. M. Boland, W. N. Haining, D. E. Root, J. G. Doench, N. Hacohen, K. B. Yates, R. T. Manguso, *In vivo* CRISPR screens reveal the landscape of immune evasion pathways across cancer. *Nat. Immunol.* **23**, 1495–1506 (2022).
38. A. Lin, Z. Qiu, J. Zhang, P. Luo, Effect of NCOR1 mutations on immune microenvironment and efficacy of immune checkpoint inhibitors in patient with bladder cancer. *Front. Immunol.* **12**, 630773 (2021).
39. S. Park, C.-Y. Ock, H. Kim, S. Pereira, S. Park, M. Ma, S. Choi, S. Kim, S. Shin, B. J. Aum, K. Paeng, D. Yoo, H. Cha, S. Park, K. J. Suh, H. A. Jung, S. H. Kim, Y. J. Kim, J.-M. Sun, J.-H. Chung, J. S. Ahn, M.-J. Ahn, J. S. Lee, K. Park, S. Y. Song, Y.-J. Bang, Y.-L. Choi, T. S. Mok, S.-H. Lee, Artificial intelligence-powered spatial analysis of tumor-infiltrating lymphocytes as complementary biomarker for immune checkpoint inhibition in non-small-cell lung cancer. *J. Clin. Oncol.* **40** 1916–1928 (2022).
40. Cancer Genome Atlas Research Network, Comprehensive molecular profiling of lung adenocarcinoma. *Nature* **511**, 543–550 (2014).
41. Cancer Genome Atlas Research Network, Comprehensive genomic characterization of squamous cell lung cancers. *Nature* **489**, 519–525 (2012).

42. M. Sade-Feldman, Y. J. Jiao, J. H. Chen, M. S. Rooney, M. Barzily-Rokni, J. P. Eliane, S. L. Bjorgaard, M. R. Hammond, H. Vitzthum, S. M. Blackmon, D. T. Frederick, M. Hazar-Rethinam, B. A. Nades, E. E. Van Seventer, S. A. Shukla, K. Yizhak, J. P. Ray, D. Rosebrock, D. Livitz, V. Adalsteinsson, G. Getz, L. M. Duncan, B. Li, R. B. Corcoran, D. P. Lawrence, A. Stemmer-Rachamimov, G. M. Boland, D. A. Landau, K. T. Flaherty, R. J. Sullivan, N. Hacohen, Resistance to checkpoint blockade therapy through inactivation of antigen presentation. *Nat. Commun.* **8**, 1062 (2017).
43. M. Y. Teo, K. Seier, I. Ostrovnaya, A. M. Regazzi, B. E. Kania, M. M. Moran, C. K. Cipolla, M. J. Bluth, J. Chaim, H. Al-Ahmadie, A. Snyder, M. I. Carlo, D. B. Solit, M. F. Berger, S. Funt, J. D. Wolchok, G. Iyer, D. F. Bajorin, M. K. Callahan, J. E. Rosenberg, Alterations in DNA damage response and repair genes as potential marker of clinical benefit from PD-1/PD-L1 blockade in advanced urothelial cancers. *J. Clin. Oncol.* **36**, 1685–1694 (2018).
44. R. Ramapriyan, M. S. Caetano, H. B. Barsoumian, A. C. P. Mafra, E. P. Zambalde, H. Menon, E. Tsouko, J. W. Welsh, M. A. Cortez, Altered cancer metabolism in mechanisms of immunotherapy resistance. *Pharmacol. Ther.* **195**, 162–171 (2019).
45. K. J. Lastwika, W. Wilson, Q. K. Li, J. Norris, H. Xu, S. R. Ghazarian, H. Kitagawa, S. Kawabata, J. M. Taube, S. Yao, L. N. Liu, J. J. Gills, P. A. Dennis, Control of PD-L1 expression by oncogenic activation of the AKT–mTOR pathway in non–small cell lung cancer. *Cancer Res.* **76**, 227–238 (2016).
46. T. Ohta, K. Iijima, M. Miyamoto, I. Nakahara, H. Tanaka, M. Ohtsuji, T. Suzuki, A. Kobayashi, J. Yokota, T. Sakiyama, T. Shibata, M. Yamamoto, S. Hirohashi, Loss of Keap1 function activates Nrf2 and provides advantages for lung cancer cell growth. *Cancer Res.* **68**, 1303–1309 (2008).
47. B. Ricciuti, K. C. Arbour, J. J. Lin, A. Vajdi, N. Vokes, L. Hong, J. Zhang, M. Y. Tolstorukov, Y. Y. Li, L. F. Spurr, A. D. Cherniack, G. Recondo, G. Lamberti, X. Wang, D. Venkatraman, J. V. Alessi, V. R. Vaz, H. Rizvi, J. Egger, A. J. Plodkowski, S. Khosrowjerdi, S. Digumarthy, H. Park, N. Vaz, M. Nishino, L. M. Sholl, D. Barbie, M. Altan, J. V. Heymach, F. Skoulidis, J. F. Gainor, M. D. Hellmann, M. M. Awad, Diminished efficacy of programmed death-(Ligand)1 inhibition in STK11- and KEAP1-mutant lung adenocarcinoma is affected by KRAS mutation status. *J. Thorac. Oncol.* **17**, 399–410 (2022).

48. M. M. Kaneda, K. S. Messer, N. Ralainirina, H. Li, C. J. Leem, S. Gorjestani, G. Woo, A. V. Nguyen, C. C. Figueiredo, P. Foubert, M. C. Schmid, M. Pink, D. G. Winkler, M. Rausch, V. J. Palombella, J. Kutok, K. McGovern, K. A. Frazer, X. Wu, M. Karin, R. Sasik, E. E. W. Cohen, J. A. Varner, PI3K $\gamma$  is a molecular switch that controls immune suppression. *Nature* **539**, 437–442 (2016).
49. O. De Henau, M. Rausch, D. Winkler, L. F. Campesato, C. Liu, D. H. Cymerman, S. Budhu, A. Ghosh, M. Pink, J. Tchaicha, M. Douglas, T. Tibbitts, S. Sharma, J. Proctor, N. Kosmider, K. White, H. Stern, J. Soglia, J. Adams, V. J. Palombella, K. McGovern, J. L. Kutok, J. D. Wolchok, T. Merghoub, Overcoming resistance to checkpoint blockade therapy by targeting PI3K $\gamma$  in myeloid cells. *Nature* **539**, 443–447 (2016).
50. J. Wang, M. Li, X. Han, H. Wang, X. Wang, G. Ma, T. Xia, S. Wang, MiR-1976 knockdown promotes epithelial–mesenchymal transition and cancer stem cell properties inducing triple-negative breast cancer metastasis. *Cell Death Dis.* **11**, 1–12 (2020).
51. G. S. Bova, H. M. L. Kallio, M. Annala, K. Kivinummi, G. Högnäs, S. Häyrynen, T. Rantapero, V. Kivinen, W. B. Isaacs, T. Tolonen, M. Nykter, T. Visakorpi, Integrated clinical, whole-genome, and transcriptome analysis of multisampled lethal metastatic prostate cancer. *Cold Spring Harb. Mol. Case Stud.* **2**, a000752 (2016).
52. M. Falasca, T. Maffucci, Targeting p110 $\gamma$  in gastrointestinal cancers: Attack on multiple fronts. *Front. Physiol.* **5**, 391 (2014).
53. C. Torres, G. Mancinelli, J. Cordoba-Chacon, N. Viswakarma, K. Castellanos, S. Grimaldo, S. Kumar, D. Principe, M. J. Dorman, R. McKinney, E. Hirsch, D. Dawson, H. G. Munshi, A. Rana, P. J. Grippo, p110 $\gamma$  deficiency protects against pancreatic carcinogenesis yet predisposes to diet-induced hepatotoxicity. *Proc. Natl. Acad. Sci. U.S.A.* **116**, 14724–14733 (2019).
54. S. Zhang, W.-C. Chung, G. Wu, S. E. Egan, L. Miele, K. Xu, Manic fringe promotes a claudin-low breast cancer phenotype through notch-mediated PIK3CG induction. *Cancer Res.* **75**, 1936–1943 (2015).

55. M. K. Rathinaswamy, U. Dalwadi, K. D. Fleming, C. Adams, J. T. B. Stariha, E. Pardon, M. Baek, O. Vadas, F. DiMaio, J. Steyaert, S. D. Hansen, C. K. Yip, J. E. Burke, Structure of the phosphoinositide 3-kinase (PI3K) p110 $\gamma$ -p101 complex reveals molecular mechanism of GPCR activation. *Sci. Adv.* **7**, eabj4282 (2021).
56. M. K. Rathinaswamy, Z. Gaieb, K. D. Fleming, C. Borsari, N. J. Harris, B. E. Moeller, M. P. Wymann, R. E. Amaro, J. E. Burke, Disease-related mutations in PI3K $\gamma$  disrupt regulatory C-terminal dynamics and reveal a path to selective inhibitors. *Elife* **10**, e64691 (2021).
57. P. J. Brown, K. K. Wong, S. L. Felce, L. Lyne, H. Spearman, E. J. Soilleux, L. M. Pedersen, M. B. Møller, T. M. Green, D. M. Gascoyne, A. H. Banham, FOXP1 suppresses immune response signatures and MHC class II expression in activated B-cell-like diffuse large B-cell lymphomas. *Leukemia* **30**, 605–616 (2016).
58. H. Wang, J. Geng, X. Wen, E. Bi, A. V. Kossenkoy, A. I. Wolf, J. Tas, Y. S. Choi, H. Takata, T. J. Day, L.-Y. Chang, S. L. Sprout, E. K. Becker, J. Willen, L. Tian, X. Wang, C. Xiao, P. Jiang, S. Crotty, G. D. Victora, L. C. Showe, H. O. Tucker, J. Erikson, H. Hu, The transcription factor Foxp1 is a critical negative regulator of the differentiation of follicular helper T cells. *Nat. Immunol.* **15**, 667–675 (2014).
59. P. De Silva, S. Garaud, C. Solinas, A. de Wind, G. Van den Eyden, V. Jose, C. Gu-Trantien, E. Migliori, A. Boisson, C. Naveaux, H. Duvillier, L. Craciun, D. Larsimont, M. Piccart-Gebhart, K. Willard-Gallo, FOXP1 negatively regulates tumor infiltrating lymphocyte migration in human breast cancer. *EBioMedicine* **39**, 226–238 (2019).
60. T. Davoli, H. Uno, E. C. Wooten, S. J. Elledge, Tumor aneuploidy correlates with markers of immune evasion and with reduced response to immunotherapy. *Science* **355**, eaaf8399 (2017).
61. S. Mohammadi, J. Davila-Velderrain, M. Kellis, Reconstruction of cell-type-specific interactomes at single-cell resolution. *Cell Syst.* **9**, 559–568.e4 (2019).
62. Y. Qin, E. L. Huttlin, C. F. Winsnes, M. L. Gosztyla, L. Wacheul, M. R. Kelly, S. M. Blue, F. Zheng, M. Chen, L. V. Schaffer, K. Licon, A. Bäckström, L. P. Vaites, J. J. Lee, W. Ouyang, S. N. Liu, T. Zhang, E. Silva, J. Park, A. Pitea, J. F. Kreisberg, S. P. Gygi, J. Ma, J. W. Harper, G. W. Yeo, D. L. J.

- Lafontaine, E. Lundberg, T. Ideker, A multi-scale map of cell structure fusing protein images and interactions. *Nature* **600**, 1–7 (2021).
63. T. Hart, M. Chandrashekhar, M. Aregger, Z. Steinhart, K. R. Brown, G. MacLeod, M. Mis, M. Zimmermann, A. Fradet-Turcotte, S. Sun, P. Mero, P. Dirks, S. Sidhu, F. P. Roth, O. S. Rissland, D. Durocher, S. Angers, J. Moffat, High-resolution CRISPR screens reveal fitness genes and genotype-specific cancer liabilities. *Cell* **163**, 1515–1526 (2015).
64. Y. Cai, M. J. Hossain, J.-K. Hériché, A. Z. Politi, N. Walther, B. Koch, M. Wachsmuth, B. Nijmeijer, M. Kueblbeck, M. Martinic-Kavur, R. Ladurner, S. Alexander, J.-M. Peters, J. Ellenberg, Experimental and computational framework for a dynamic protein atlas of human cell division. *Nature* **561**, 411–415 (2018).
65. L. M. Boll, J. Perera-Bel, A. Rodriguez-Vida, O. Arpí, A. Rovira, N. Juanpere, S. Vázquez Montes de Oca, S. Hernández-Llodrà, J. Lloreta, M. M. Albà, J. Bellmunt, The impact of mutational clonality in predicting the response to immune checkpoint inhibitors in advanced urothelial cancer. *Sci. Rep.* **13**, 15287 (2023).
66. A. Mayakonda, D.-C. Lin, Y. Assenov, C. Plass, H. P. Koeffler, Maftools: Efficient and comprehensive analysis of somatic variants in cancer. *Genome Res.* **28**, 1747–1756 (2018).
67. D. R. Cox, Regression models and life-tables. *J. R. Stat. Soc. Ser. B* **34**, 187–202 (1972).
68. H. Ishwaran, U. B. Kogalur, E. H. Blackstone, M. S. Lauer, Random survival forests. *Ann. Appl. Stat.* **2**, 841–860 (2008).
69. C. Davidson-Pilon, Lifelines: Survival analysis in Python. *J. Open Source Softw.* **4**, 1317 (2019).
70. S. Pölsterl, Scikit-survival: A library for time-to-event analysis built on top of scikit-learn. *J. Mach. Learn. Res.* **21**, 1–6 (2020).
71. R. T. Pillich, J. Chen, C. Churas, D. Fong, B. M. Gyori, T. Ideker, K. Karis, S. N. Liu, K. Ono, A. Pico, D. Pratt, NDEx IQuery: A multi-method network gene set analysis leveraging the network data exchange. *Bioinformatics* **39**, btad118 (2023).

72. K. Hanspers, A. Riutta, M. Summer-Kutmon, A. R. Pico, Pathway information extracted from 25 years of pathway figures. *Genome Biol.* **21**, 273 (2020).
73. E. Cerami, J. Gao, U. Dogrusoz, B. E. Gross, S. O. Sumer, The cBio cancer genomics portal: An open platform for exploring multidimensional cancer genomics data. *Cancer Discov.* **2**, 401–404 (2012).
74. J. Gao, B. A. Aksoy, U. Dogrusoz, G. Dresdner, B. Gross, S. O. Sumer, Y. Sun, A. Jacobsen, R. Sinha, E. Larsson, E. Cerami, C. Sander, N. Schultz, Integrative analysis of complex cancer genomics and clinical profiles using the cBioPortal. *Sci. Signal.* **6**, 11 (2013).
75. A. Colaprico, T. C. Silva, C. Olsen, L. Garofano, C. Cava, D. Garolini, T. S. Sabedot, T. M. Malta, S. M. Pagnotta, I. Castiglioni, M. Ceccarelli, G. Bontempi, H. Noushmehr, TCGAbiolinks: An R/Bioconductor package for integrative analysis of TCGA data. *Nucleic Acids Res.* **44**, e71 (2016).
76. D. Pratt, J. Chen, D. Welker, R. Rivas, R. Pillich, V. Rynkov, K. Ono, C. Miello, L. Hicks, S. Szalma, A. Stojmirovic, R. Dobrin, M. Braxenthaler, J. Kuentzer, B. Demchak, T. Ideker, NDEx, the network data exchange. *Cell Syst.* **1**, 302–305 (2015).
77. N. Hartman, S. Kim, K. He, J. D. Kalbfleisch, Pitfalls of the concordance index for survival outcomes. *Stat. Med.* **42**, 2179–2190 (2023).
78. B. Jassal, L. Matthews, G. Viteri, C. Gong, P. Lorente, A. Fabregat, K. Sidiropoulos, J. Cook, M. Gillespie, R. Haw, F. Loney, B. May, M. Milacic, K. Rothfels, C. Sevilla, V. Shamovsky, S. Shorsler, T. Varusai, J. Weiser, G. Wu, L. Stein, H. Hermjakob, P. D'Eustachio, The reactome pathway knowledgebase. *Nucleic Acids Res.* **48**, D498–D503 (2020).
79. H. Mi, A. Muruganujan, D. Ebert, X. Huang, P. D. Thomas, PANTHER version 14: More genomes, a new PANTHER GO-slim and improvements in enrichment analysis tools. *Nucleic Acids Res.* **47**, D419–D426 (2019).
80. Q. He, C. Sun, Y. Pan, Whole-exome sequencing reveals Lewis lung carcinoma is a hypermutated Kras/Nras–mutant cancer with extensive regional mutation clusters in its genome. *Sci. Rep.* **14**, 1–14 (2024).

81. J. G. Doench, E. Hartenian, D. B. Graham, Z. Tothova, M. Hegde, I. Smith, M. Sullender, B. L. Ebert, R. J. Xavier, D. E. Root, Rational design of highly active sgRNAs for CRISPR-Cas9-mediated gene inactivation. *Nat. Biotechnol.* **32**, 1262–1267 (2014).
82. A. Subramanian, P. Tamayo, V. K. Mootha, S. Mukherjee, B. L. Ebert, M. A. Gillette, A. Paulovich, S. L. Pomeroy, T. R. Golub, E. S. Lander, J. P. Mesirov, Gene set enrichment analysis: A knowledge-based approach for interpreting genome-wide expression profiles. *Proc. Natl. Acad. Sci. U. S. A.* **102**, 15545-15550 (2005).
83. Z. Fang, X. Liu, G. Peltz, GSEAPy: A comprehensive package for performing gene set enrichment analysis in Python. *Bioinformatics* **39**, btac757 (2023).
84. V. Thorsson, D. L. Gibbs, S. D. Brown, D. Wolf, D. S. Bortone, T. H. Ou Yang, E. Porta-Pardo, G. F. Gao, C. L. Plaisier, J. A. Eddy, E. Ziv, A. C. Culhane, E. O. Paull, I. K. A. Sivakumar, A. J. Gentles, R. Malhotra, F. Farshidfar, A. Colaprico, J. S. Parker, L. E. Mose, N. S. Vo, J. Liu, Y. Liu, J. Rader, V. Dhankani, S. M. Reynolds, R. Bowlby, A. Califano, A. D. Cherniack, D. Anastassiou, D. Bedognetti, A. Rao, K. Chen, A. Krasnitz, H. Hu, T. M. Malta, H. Noushmehr, C. S. Pedomallu, S. Bullman, A. I. Ojesina, A. Lamb, W. Zhou, H. Shen, T. K. Choueiri, J. N. Weinstein, J. Guinney, J. Saltz, R. Holt, C. E. Rabkin, S. J. Caesar-Johnson, J. A. Demchok, I. Felau, M. Kasapi, M. L. Ferguson, C. M. Hutter, H. J. Sofia, R. Tarnuzzer, Z. Wang, L. Yang, J. C. Zenklusen, J. Zhang, S. Chudamani, J. Liu, L. Lolla, R. Naresh, T. Pihl, Q. Sun, Y. Wan, Y. Wu, J. Cho, T. DeFreitas, S. Frazer, N. Gehlenborg, G. Getz, D. I. Heiman, J. Kim, M. S. Lawrence, P. Lin, S. Meier, M. S. Noble, G. Saksena, D. Voet, H. Zhang, B. Bernard, N. Chambwe, V. Dhankani, T. Knijnenburg, R. Kramer, K. Leinonen, Y. Liu, M. Miller, S. Reynolds, I. Shmulevich, V. Thorsson, W. Zhang, R. Akbani, B. M. Broom, A. M. Hegde, Z. Ju, R. S. Kanchi, A. Korkut, J. Li, H. Liang, S. Ling, W. Liu, Y. Lu, G. B. Mills, K. S. Ng, A. Rao, M. Ryan, J. Wang, J. Zhang, A. Abeshouse, J. Armenia, D. Chakravarty, W. K. Chatila, I. de Bruijn, J. Gao, B. E. Gross, Z. J. Heins, R. Kundra, K. La, M. Ladanyi, A. Luna, M. G. Nissan, A. Ochoa, S. M. Phillips, E. Reznik, F. Sanchez-Vega, C. Sander, N. Schultz, R. Sheridan, S. O. Sumer, Y. Sun, B. S. Taylor, J. Wang, H. Zhang, P. Anur, M. Peto, P. Spellman, C. Benz, J. M. Stuart, C. K. Wong, C. Yau, D. N. Hayes, J. S. Parker, M. D. Wilkerson, A. Ally, M. Balasundaram, R. Bowlby, D. Brooks, R. Carlsen, E. Chuah, N. Dhalla, S. J. M. Jones, K. Kasaian, D. Lee, Y. Ma, M. A. Marra, M. Mayo, R. A. Moore, A. J. Mungall, K. Mungall, A. G. Robertson, S. Sadeghi, J. E. Schein, P. Sipahimalani, A. Tam, N. Thiessen,



K. Tse, T. Wong, A. C. Berger, R. Beroukhim, A. D. Cherniack, C. Cibulskis, S. B. Gabriel, G. Ha, M. Meyerson, S. E. Schumacher, J. Shih, M. H. Kucherlapati, R. S. Kucherlapati, S. Baylin, L. Cope, L. Danilova, M. S. Bootwalla, P. H. Lai, D. T. Maglinte, D. J. Van Den Berg, D. J. Weisenberger, J. T. Auman, S. Balu, T. Bodenheimer, C. Fan, K. A. Hoadley, A. P. Hoyle, S. R. Jefferys, C. D. Jones, S. Meng, P. A. Mieczkowski, L. E. Mose, A. H. Perou, C. M. Perou, J. Roach, Y. Shi, J. V. Simons, T. Skelly, M. G. Soloway, D. Tan, U. Veluvolu, H. Fan, T. Hinoue, P. W. Laird, H. Shen, W. Zhou, M. Bellair, K. Chang, K. Covington, C. J. Creighton, H. Dinh, H. V. Doddapaneni, L. A. Donehower, J. Drummond, R. A. Gibbs, R. Glenn, W. Hale, Y. Han, J. Hu, V. Korchina, S. Lee, L. Lewis, W. Li, X. Liu, M. Morgan, D. Morton, D. Muzny, J. Santibanez, M. Sheth, E. Shinbrot, L. Wang, M. Wang, D. A. Wheeler, L. Xi, F. Zhao, J. Hess, E. L. Appelbaum, M. Bailey, M. G. Cordes, L. Ding, C. C. Fronick, L. A. Fulton, R. S. Fulton, C. Kandoth, E. R. Mardis, M. D. McLellan, C. A. Miller, H. K. Schmidt, R. K. Wilson, D. Crain, E. Curley, J. Gardner, K. Lau, D. Mallery, S. Morris, J. Paulauskis, R. Penny, C. Shelton, T. Shelton, M. Sherman, E. Thompson, P. Yena, J. Bowen, J. M. Gastier-Foster, M. Gerken, K. M. Leraas, T. M. Lichtenberg, N. C. Ramirez, L. Wise, E. Zmuda, N. Corcoran, T. Costello, C. Hovens, A. L. Carvalho, A. C. de Carvalho, J. H. Fregnani, A. Longatto-Filho, R. M. Reis, C. Scapulatempo-Neto, H. C. S. Silveira, D. O. Vidal, A. Burnette, J. Eschbacher, B. Hermes, A. Noss, R. Singh, M. L. Anderson, P. D. Castro, M. Ittmann, D. Huntsman, B. Kohl, X. Le, R. Thorp, C. Andry, E. R. Duffy, V. Lyadov, O. Paklina, G. Setdikova, A. Shabunin, M. Tavobilov, C. McPherson, R. Warnick, R. Berkowitz, D. Cramer, C. Feltmate, N. Horowitz, A. Kibel, M. Muto, C. P. Raut, A. Malykh, J. S. Barnholtz-Sloan, W. Barrett, K. Devine, J. Fulop, Q. T. Ostrom, K. Shimmel, Y. Wolinsky, A. E. Sloan, A. De Rose, F. Giuliante, M. Goodman, B. Y. Karlan, C. H. Hagedorn, J. Eckman, J. Harr, J. Myers, K. Tucker, L. A. Zach, B. Deyarmin, H. Hu, L. Kvecher, C. Larson, R. J. Mural, S. Somiari, A. Vicha, T. Zelinka, J. Bennett, M. Iacocca, B. Rabeno, P. Swanson, M. Latour, L. Lacombe, B. Têtu, A. Bergeron, M. McGraw, S. M. Staugaitis, J. Chabot, H. Hibshoosh, A. Sepulveda, T. Su, T. Wang, O. Potapova, O. Voronina, L. Desjardins, O. Mariani, S. Roman-Roman, X. Sastre, M. H. Stern, F. Cheng, S. Signoretti, A. Berchuck, D. Bigner, E. Lipp, J. Marks, S. McCall, R. McLendon, A. Secord, A. Sharp, M. Behera, D. J. Brat, A. Chen, K. Delman, S. Force, F. Khuri, K. Magliocca, S. Maithel, J. J. Olson, T. Owonikoko, A. Pickens, S. Ramalingam, D. M. Shin, G. Sica, E. G. Van Meir, H. Zhang, W. Eijckenboom, A. Gillis, E. Korpershoek, L. Looijenga, W. Oosterhuis, H. Stoop, K. E. van Kessel, E. C. Zwarthoff, C. Calatuzzolo, L. Cuppini, S. Cuzzubbo, F. DiMeco, G. Finocchiaro, L. Mattei, A. Perin, B. Pollo, C. Chen, J. Houck, P. Lohavanichbutr, A. Hartmann, C. Stoehr, R. Stoehr, H. Taubert, S. Wach,

B. Wullich, W. Kycler, D. Murawa, M. Wiznerowicz, K. Chung, W. J. Edenfield, J. Martin, E. Baudin, G. Bublely, R. Bueno, A. De Rienzo, W. G. Richards, S. Kalkanis, T. Mikkelsen, H. Noushmehr, L. Scarpace, N. Girard, M. Aymerich, E. Campo, E. Giné, A. L. Guillermo, N. Van Bang, P. T. Hanh, B. D. Phu, Y. Tang, H. Colman, K. Evason, P. R. Dottino, J. A. Martignetti, H. Gabra, H. Juhl, T. Akeredolu, S. Stepa, D. Hoon, K. Ahn, K. J. Kang, F. Beuschlein, A. Breggia, M. Birrer, D. Bell, M. Borad, A. H. Bryce, E. Castle, V. Chandan, J. Cheville, J. A. Copland, M. Farnell, T. Flotte, N. Giama, T. Ho, M. Kendrick, J. P. Kocher, K. Kopp, C. Moser, D. Nagorney, D. O'Brien, B. P. O'Neill, T. Patel, G. Petersen, F. Que, M. Rivera, L. Roberts, R. Smallridge, T. Smyrk, M. Stanton, R. H. Thompson, M. Torbenson, J. D. Yang, L. Zhang, F. Brimo, J. A. Ajani, A. M. A. Gonzalez, C. Behrens, J. Bondaruk, R. Broaddus, B. Czerniak, B. Esmaeli, J. Fujimoto, J. Gershenwald, C. Guo, A. J. Lazar, C. Logothetis, F. Meric-Bernstam, C. Moran, L. Ramondetta, D. Rice, A. Sood, P. Tamboli, T. Thompson, P. Troncoso, A. Tsao, I. Wistuba, C. Carter, L. Haydu, P. Hersey, V. Jakrot, H. Kakavand, R. Kefford, K. Lee, G. Long, G. Mann, M. Quinn, R. Saw, R. Scolyer, K. Shannon, A. Spillane, O. Stretch, M. Synott, J. Thompson, J. Wilmott, H. Al-Ahmadie, T. A. Chan, R. Ghossein, A. Gopalan, D. A. Levine, V. Reuter, S. Singer, B. Singh, N. V. Tien, T. Broudy, C. Mirsaidi, P. Nair, P. Drwiega, J. Miller, J. Smith, H. Zaren, J. W. Park, N. P. Hung, E. Kebebew, W. M. Linehan, A. R. Metwalli, K. Pacak, P. A. Pinto, M. Schiffman, L. S. Schmidt, C. D. Vocke, N. Wentzensen, R. Worrell, H. Yang, M. Moncrieff, C. Goparaju, J. Melamed, H. Pass, N. Botnariuc, I. Caraman, M. Cernat, I. Chemencedji, A. Clipca, S. Doruc, G. Gorincioi, S. Mura, M. Pirtac, I. Stancul, D. Tcaciuc, M. Albert, I. Alexopoulou, A. Arnaout, J. Bartlett, J. Engel, S. Gilbert, J. Parfitt, H. Sekhon, G. Thomas, D. M. Rassl, R. C. Rintoul, C. Bifulco, R. Tamakawa, W. Urba, N. Hayward, H. Timmers, A. Antenucci, F. Facciolo, G. Grazi, M. Marino, R. Merola, R. de Krijger, A. P. Gimenez-Roqueplo, A. Piché, S. Chevalier, G. McKercher, K. Birsoy, G. Barnett, C. Brewer, C. Farver, T. Naska, N. A. Pennell, D. Raymond, C. Schilero, K. Smolenski, F. Williams, C. Morrison, J. A. Borgia, M. J. Liptay, M. Pool, C. W. Seder, K. Junker, L. Omberg, M. Dinkin, G. Manikhas, D. Alvaro, M. C. Bragazzi, V. Cardinale, G. Carpino, E. Gaudio, D. Chesla, S. Cottingham, M. Dubina, F. Moiseenko, R. Dhanasekaran, K. F. Becker, K. P. Janssen, J. Slotta-Huspenina, M. H. Abdel-Rahman, D. Aziz, S. Bell, C. M. Cebulla, A. Davis, R. Duell, J. B. Elder, J. Hilty, B. Kumar, J. Lang, N. L. Lehman, R. Mandt, P. Nguyen, R. Pilarski, K. Rai, L. Schoenfield, K. Senecal, P. Wakely, P. Hansen, R. Lechan, J. Powers, A. Tischler, W. E. Grizzle, K. C. Sexton, A. Kastl, J. Henderson, S. Porten, J. Waldmann, M. Fassnacht, S. L. Asa, D. Schadendorf, M. Couce, M. Graefen, H. Huland, G. Sauter, T. Schlomm, R. Simon, P. Tennstedt, O. Olabode, M. Nelson, O. Bathe,

P. R. Carroll, J. M. Chan, P. Disaia, P. Glenn, R. K. Kelley, C. N. Landen, J. Phillips, M. Prados, J. Simko, K. Smith-McCune, S. VandenBerg, K. Roggin, A. Fehrenbach, A. Kendler, S. Sifri, R. Steele, A. Jimeno, F. Carey, I. Forgie, M. Mannelli, M. Carney, B. Hernandez, B. Campos, C. Herold-Mende, C. Jungk, A. Unterberg, A. von Deimling, A. Bossler, J. Galbraith, L. Jacobus, M. Knudson, T. Knutson, D. Ma, M. Milhem, R. Sigmund, A. K. Godwin, R. Madan, H. G. Rosenthal, C. Adebamowo, S. N. Adebamowo, A. Boussioutas, D. Beer, T. Giordano, A. M. Mes-Masson, F. Saad, T. Bocklage, L. Landrum, R. Mannel, K. Moore, K. Moxley, R. Postier, J. Walker, R. Zuna, M. Feldman, F. Valdivieso, R. Dhir, J. Luketich, E. M. M. Pinero, M. Quintero-Aguilo, C. G. Carlotti, J. S. Dos Santos, R. Kemp, A. Sankarankuty, D. Tirapelli, J. Catto, K. Agnew, E. Swisher, J. Creaney, B. Robinson, C. S. Shelley, E. M. Godwin, S. Kendall, C. Shipman, C. Bradford, T. Carey, A. Haddad, J. Moyer, L. Peterson, M. Prince, L. Rozek, G. Wolf, R. Bowman, K. M. Fong, I. Yang, R. Korst, W. K. Rathmell, J. L. Fantacone-Campbell, J. A. Hooke, A. J. Kovatich, C. D. Shriver, J. DiPersio, B. Drake, R. Govindan, S. Heath, T. Ley, B. Van Tine, P. Westervelt, M. A. Rubin, J. I. Lee, N. D. Aredes, A. Mariamidze, J. S. Serody, E. G. Demicco, M. L. Disis, B. G. Vincent, L. Shmulevich, The immune landscape of cancer. *Immunity* **48**, 812–830.e14 (2018).

85. J. A. Joyce, D. T. Fearon, T cell exclusion, immune privilege, and the tumor microenvironment. *Science* **348**, 74–80 (2015).

86. L.-C. Chen, G. Papandreou, F. Schroff, H. Adam, Rethinking atrous convolution for semantic image segmentation. arXiv:1706.05587 [cs.CV] (2017).

87. K. He, X. Zhang, S. Ren, J. Sun, Deep residual learning for image recognition. arXiv:1512.03385 [cs.CV] (2015).

88. M. Amgad, E. S. Stovgaard, E. Balslev, J. Thagaard, W. Chen, S. Dudgeon, A. Sharma, J. K. Kerner, C. Denkert, Y. Yuan, K. AbdulJabbar, S. Wienert, P. Savas, L. Voorwerk, A. H. Beck, A. Madabhushi, J. Hartman, M. M. Sebastian, H. M. Horlings, J. Hudeček, F. Ciompi, D. A. Moore, R. Singh, E. Roblin, M. L. Balancin, M.-C. Mathieu, J. K. Lennerz, P. Kirtani, I.-C. Chen, J. P. Braybrooke, G. Pruneri, S. Demaria, S. Adams, S. J. Schnitt, S. R. Lakhani, F. Rojo, L. Comerma, S. S. Badve, M. Khojasteh, W. F. Symmans, C. Sotiriou, P. Gonzalez-Ericsson, K. L. Pogue-Geile, R. S. Kim, D. L. Rimm, G. Viale, S. M. Hewitt, J. M. S. Bartlett, F. Penault-Llorca, S. Goel, H.-C. Lien, S. Loibl, Z. Kos, S. Loi, M. G.

Hanna, S. Michiels, M. Kok, T. O. Nielsen, A. J. Lazar, Z. Bago-Horvath, L. F. S. Kooreman, J. A. W. M. van der Laak, J. Saltz, B. D. Gallas, U. Kurkure, M. Barnes, R. Salgado, L. A. D. Cooper, International Immuno-Oncology Biomarker Working Group, Report on computational assessment of tumor infiltrating lymphocytes from the international immuno-oncology biomarker working group. *NPJ Breast Cancer* **6**, 16 (2020).

89. D. S. Chen, I. Mellman, Elements of cancer immunity and the cancer-immune set point. *Nature* **541**, 321–330 (2017).
90. F. Pedregosa, G. Varoquaux, A. Gramfort, V. Michel, B. Thirion, O. Grisel, M. Blondel, P. Prettenhofer, R. Weiss, V. Dubourg, J. Vanderplas, A. Passos, D. Cournapeau, M. Brucher, M. Perrot, É. Duchesnay, Scikit-learn: Machine learning in Python. *J. Mach. Learn. Res.* **12**, 2825–2830 (2011).
91. S. M. Lundberg, S.-I. Lee. A unified approach to interpreting model predictions, in *Advances in Neural Information Processing Systems 30* (NIPS, 2017), pp. 4768–477.
92. Plotly Technologies Inc., *Collaborative Data Science* (Plotly Technologies Inc., 2015).
